# Supplementary material
Source: PubMed Central journal article supplement (PMC3740887)
Supplement: 1306342110_pnas.201306342SI.pdf [file 1306342110_pnas.201306342SI.pdf]

# Supporting Information

Dimitrov et al. 10.1073/pnas.1306342110

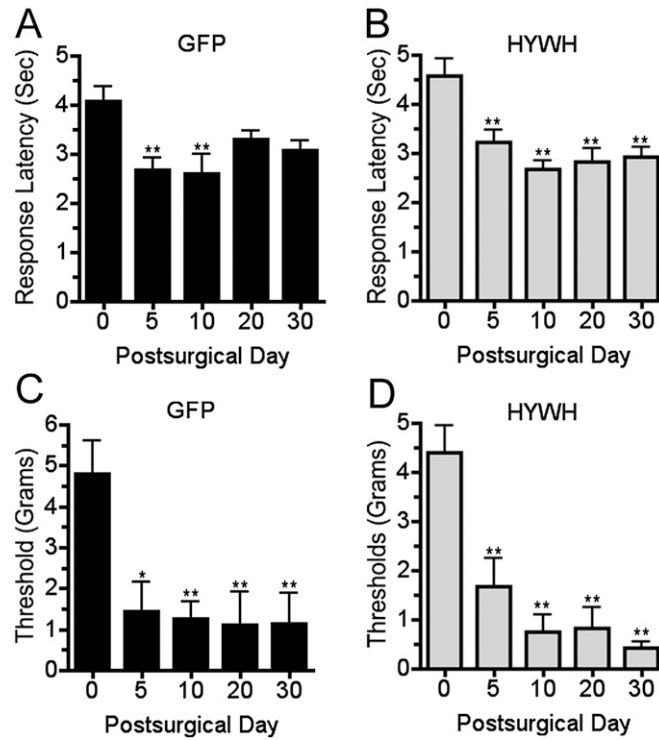

**Fig. S1.** Amygdalar injection of virus encoding a secreted PTH2-R antagonist does not affect development of hypersensitivity in mice with PNL. The central amygdaloid nucleus was targeted with a lentivirus encoding the secreted PTH2-R antagonist (HYWH-lenti). PNL was performed 3 wk after virus injection and thermal (A and B) and tactile (C and D) sensitivity assessed over time. \* $P < 0.05$ , \*\* $P < 0.01$ .

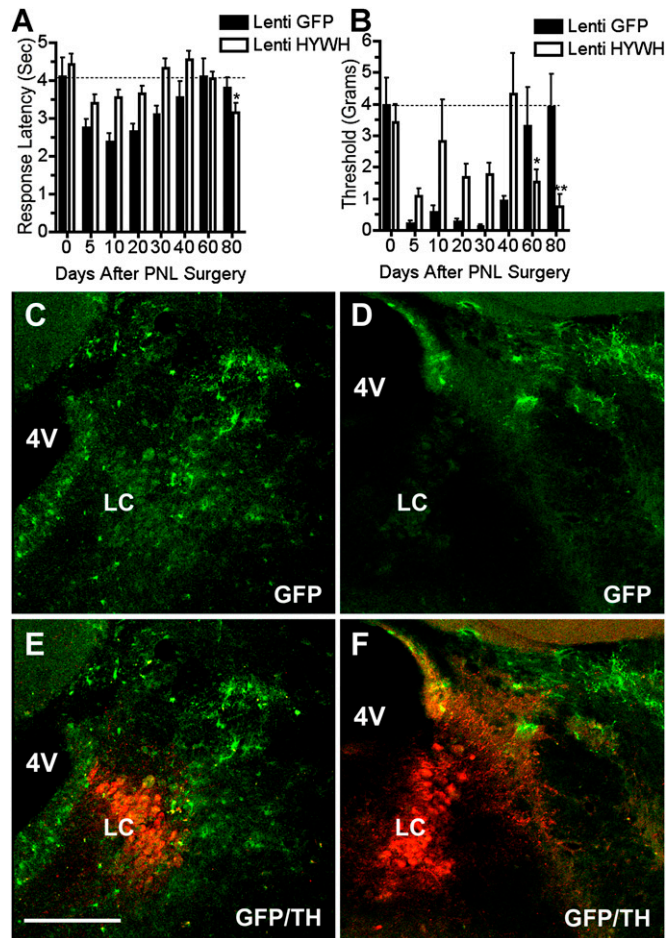

**Fig. S2.** Hypoalgesia of mice with brainstem injection of PTH2-R antagonist encoding virus is reversed at later time points. Full-time courses for the data in Fig. 5, and GFP expression in the area of HYWH-lenti injection, are shown. HYWH-lenti-injected mice developed significant thermal hypersensitivity (A) and mechanical allodynia (B) between the 60th and 80th postsurgical days, the last time point examined. The expression of GFP, a marker for ongoing lentiviral-encoded protein synthesis, was decreased after 80th postsurgical day (over 100 d after the viral injection into the LC area; D and F). Lentiviral GFP expression was greater 15 d after injection into locus ceruleus (LC) area (C and E). Noradrenergic LC neurons are labeled with anti-tyrosine hydroxylase antibody and red secondary antibody, GFP-ir is green. 4V, fourth ventricle. \* $P < 0.05$ , \*\* $P < 0.01$ . (Scale bar: 200  $\mu\text{m}$ .)

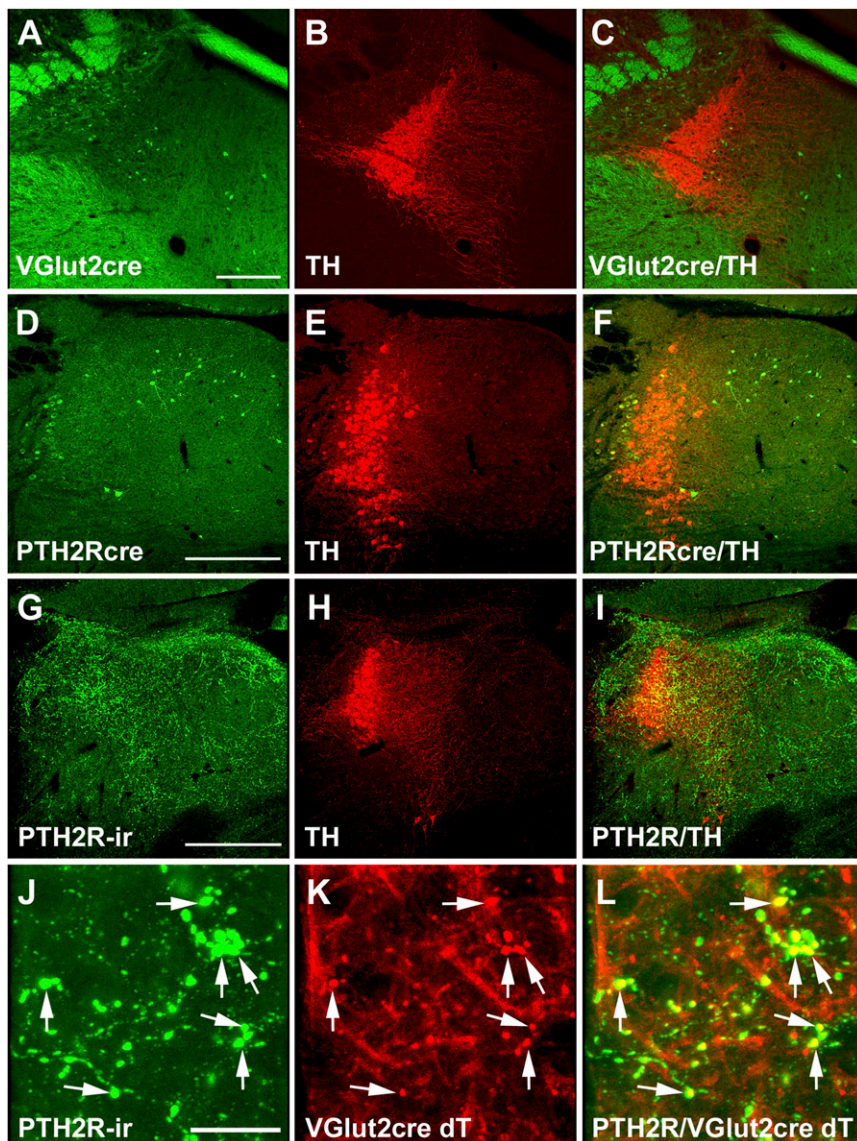

**Fig. S3.** Colocalization of PTH2R and glutamatergic markers in the LC area. Immunolabeling of tyrosine hydroxylase was performed on sections from mice that contain a fluorescent marker in VGlut2- or PTH2R-expressing neurons, or as double labeling with an antibody to the PTH2R, and PTH2R immunolabeling was performed in sections from mice with a VGlut2 marker. *A–C* show the expression of tdTomato by VGlut2-cre-positive neurons (presented in green) in the LC dendritic areas, as well as a few among the TH-ir cells of the densely populated LC core. *D–F* show PTH2R-cre cells with a distribution similar to the VGlut2-cre cells. *G–I* show the expression of PTH2R-ir fibers overlapping TH-ir cell bodies in the LC core and TH-ir processes in the LC dendritic area. High magnification images in *J–L* show colocalization of PTH2R-ir with tdTomato that marks processes of VGlut2 cells in the LC area. Arrows indicate regions of colocalization between PTH2R-ir and tdTomato expressed by VGlut2 neurons. (Scale bars: *A–I*, 200  $\mu\text{m}$ ; *J–L*, 20  $\mu\text{m}$ .)
